# Supplementary material
Source: PubMed Central journal article supplement (PMC4015339)

Supplementary materials for

Activity of nicotinic acid substituted nicotinic acid adenine dinucleotide phosphate (NAADP) analogs in a human cell line: difference in specificity between human and sea urchin NAADP receptors.

Ramadan A. Ali, Tetyana Zhelay, Christopher Trabbic, Timothy F. Walseth, James T. Slama, David R. Giovannucci, and Katherine A. Wall

Contents:

Figure S1. HPLC purification of caged NAADP and UV spectrum of each peak

Figure S2. Structure,  $^1\text{H}$  NMR,  $^{13}\text{C}$  NMR, and HRMS of 5-thiomethylnicotinic acid

Figure S3. Structure and  $^1\text{H}$  NMR of 4,5-dimethoxy-2-nitroacetophenone

Figure S4. Structure and  $^1\text{H}$  NMR of 4,5-dimethoxy-2-nitroacetophenylhydrazone

Figure S5. Structure,  $^1\text{H}$  NMR, and  $^{31}\text{P}$  NMR of DMNPE-caged NADP

Figure S6. Structure,  $^1\text{H}$  NMR,  $^{31}\text{P}$  NMR, HPLC trace, and HRMS of caged NAADP

Figure S7. Structure,  $^1\text{H}$  NMR,  $^{31}\text{P}$  NMR, HPLC trace, and HRMS of caged 4-methyl-NAADP

Figure S8. Structure,  $^1\text{H}$  NMR,  $^{31}\text{P}$  NMR, HPLC trace, and HRMS of caged 5-methyl-NAADP

Figure S9. Structure,  $^1\text{H}$  NMR,  $^{31}\text{P}$  NMR, HPLC trace, and HRMS of caged 5-amino-NAADP

Figure S10. Structure,  $^1\text{H}$  NMR,  $^{31}\text{P}$  NMR, HPLC trace, and HRMS of caged 5-thiomethyl-NAADP

Figure S1. HPLC purification of caged NAADP and UV spectrum of each peak

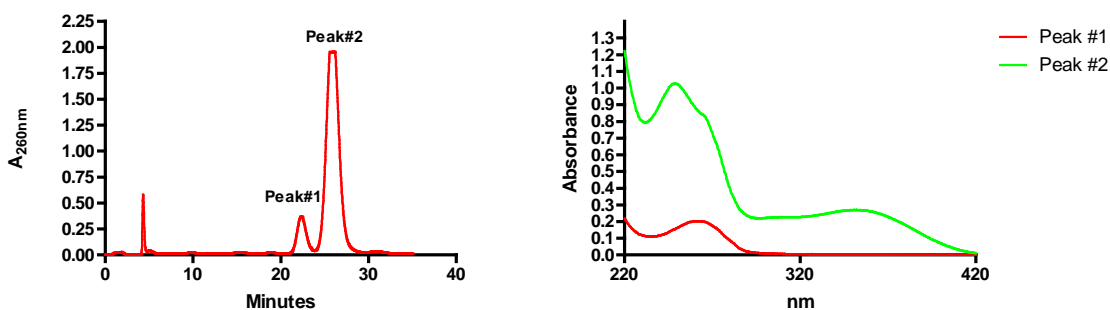

Separation of caged NAADP from contaminating NAADP. Left Panel: Caged NAADP was separated from NAADP by chromatography on an AG MP-1 column (BioRad Laboratories, Hercules, CA) using a gradient formed between water and 100 mM aqueous TFA [*Anal. Biochem.* **116** (1981) 357]. NAADP (Peak #1) eluted before caged NAADP (Peak #2). Right Panel: The identities of the peaks were confirmed by determining their UV spectra. Only Peak #2 showed the long wavelength absorption associated with the caging group. Peak #1 showed the typical UV absorption spectrum of NAADP.

Figure S2. Structure,  $^1\text{H}$  NMR,  $^{13}\text{C}$  NMR, and HRMS of 5-Thiomethylnicotinic acid

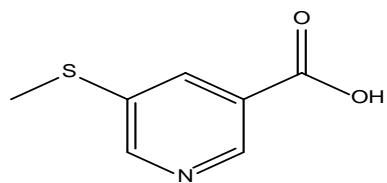

$^1\text{H}$  NMR (400 MHz,  $\text{CD}_3\text{OD}$ )

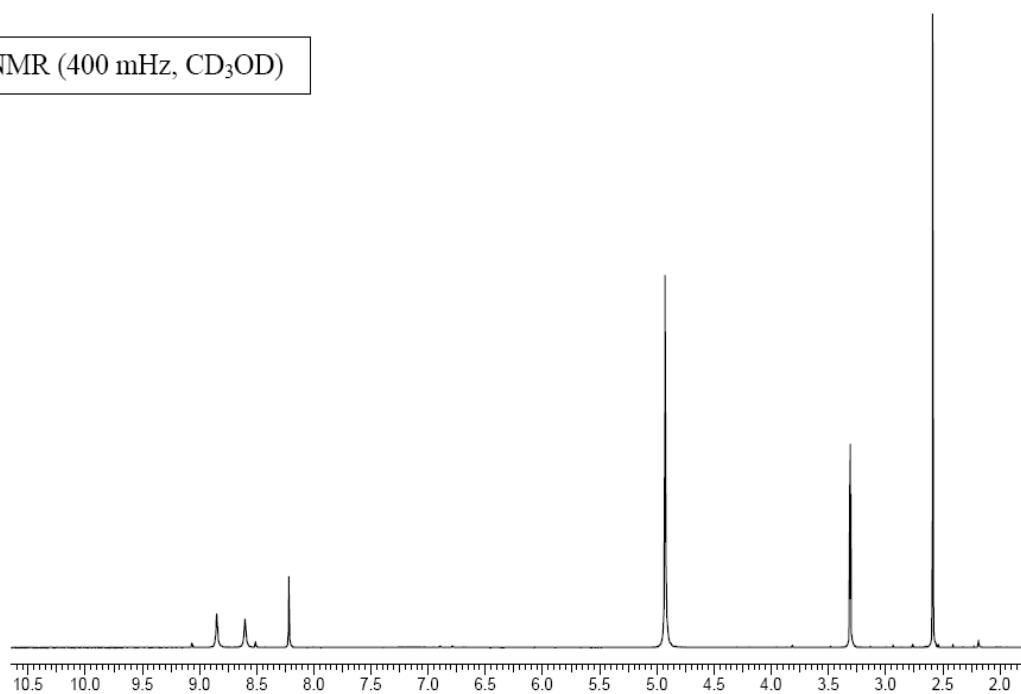

$^{13}\text{C}$  NMR (100 MHz,  $\text{CD}_3\text{OD}$ )

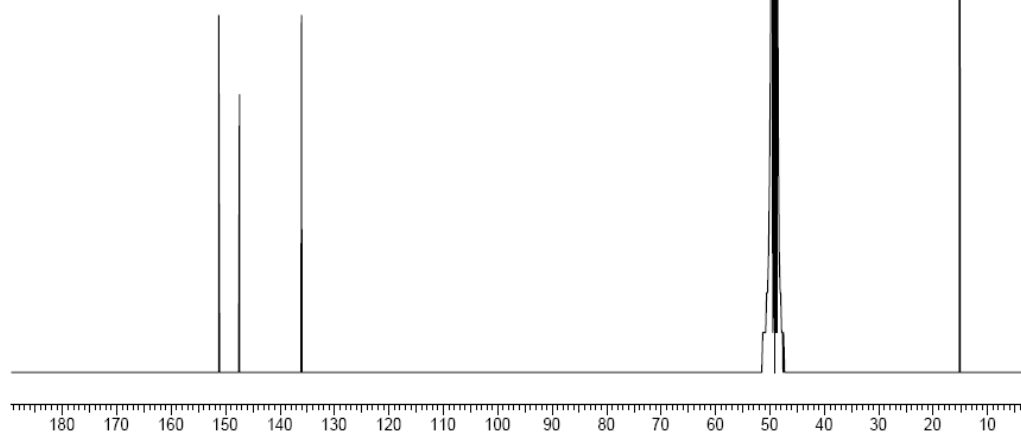

Figure S2 continued

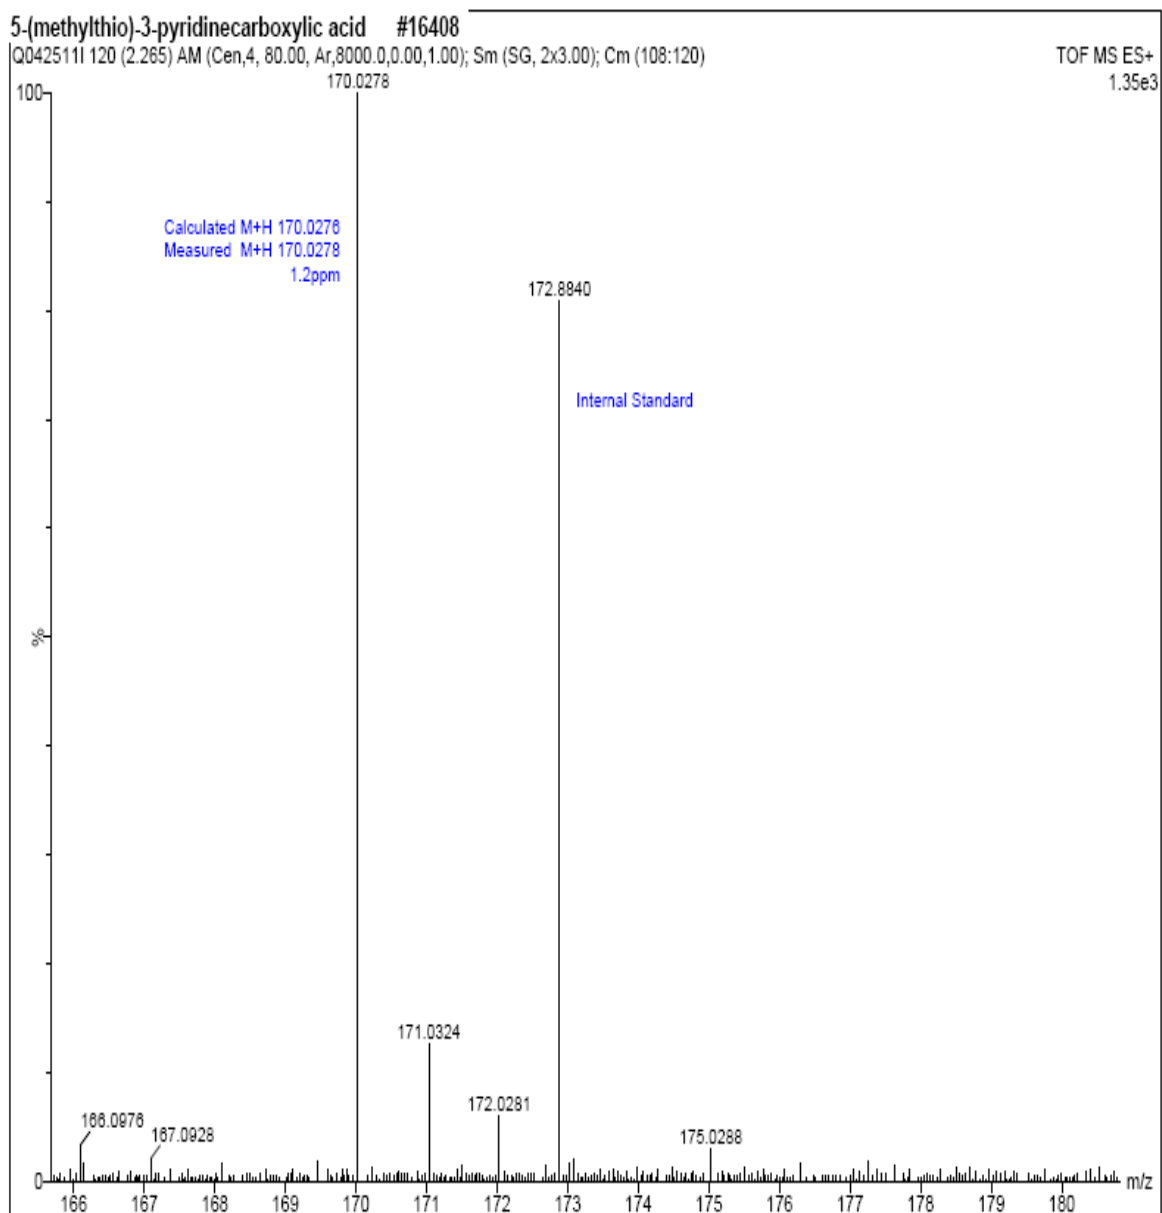

Figure S3. Structure and  $^1\text{H}$  NMR of 4,5-dimethoxy-2-nitroacetophenone

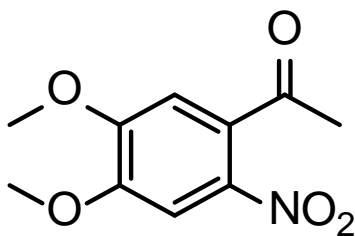

$^1\text{H}$  NMR (600 MHz,  $\text{CDCl}_3$ )

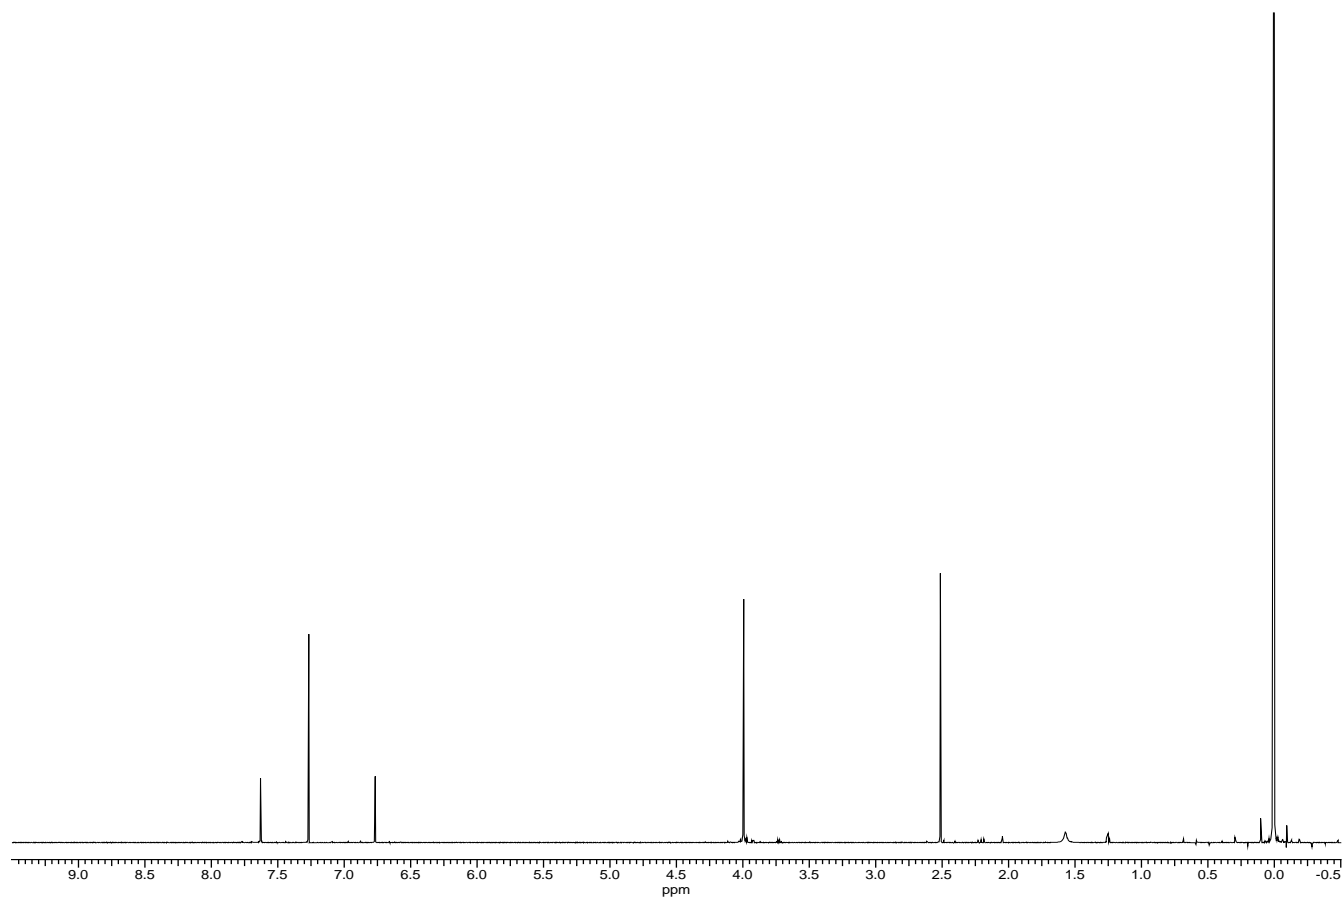

Figure S4. Structure and  $^1\text{H}$  NMR of 4,5-dimethoxy-2-nitroacetophenylhydrazone

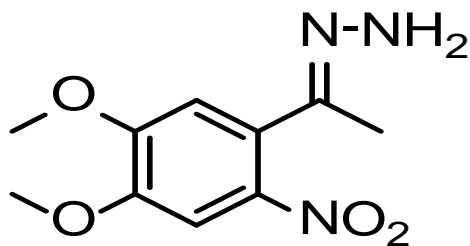

$^1\text{H}$  NMR (600 MHz, CDCl<sub>3</sub>)

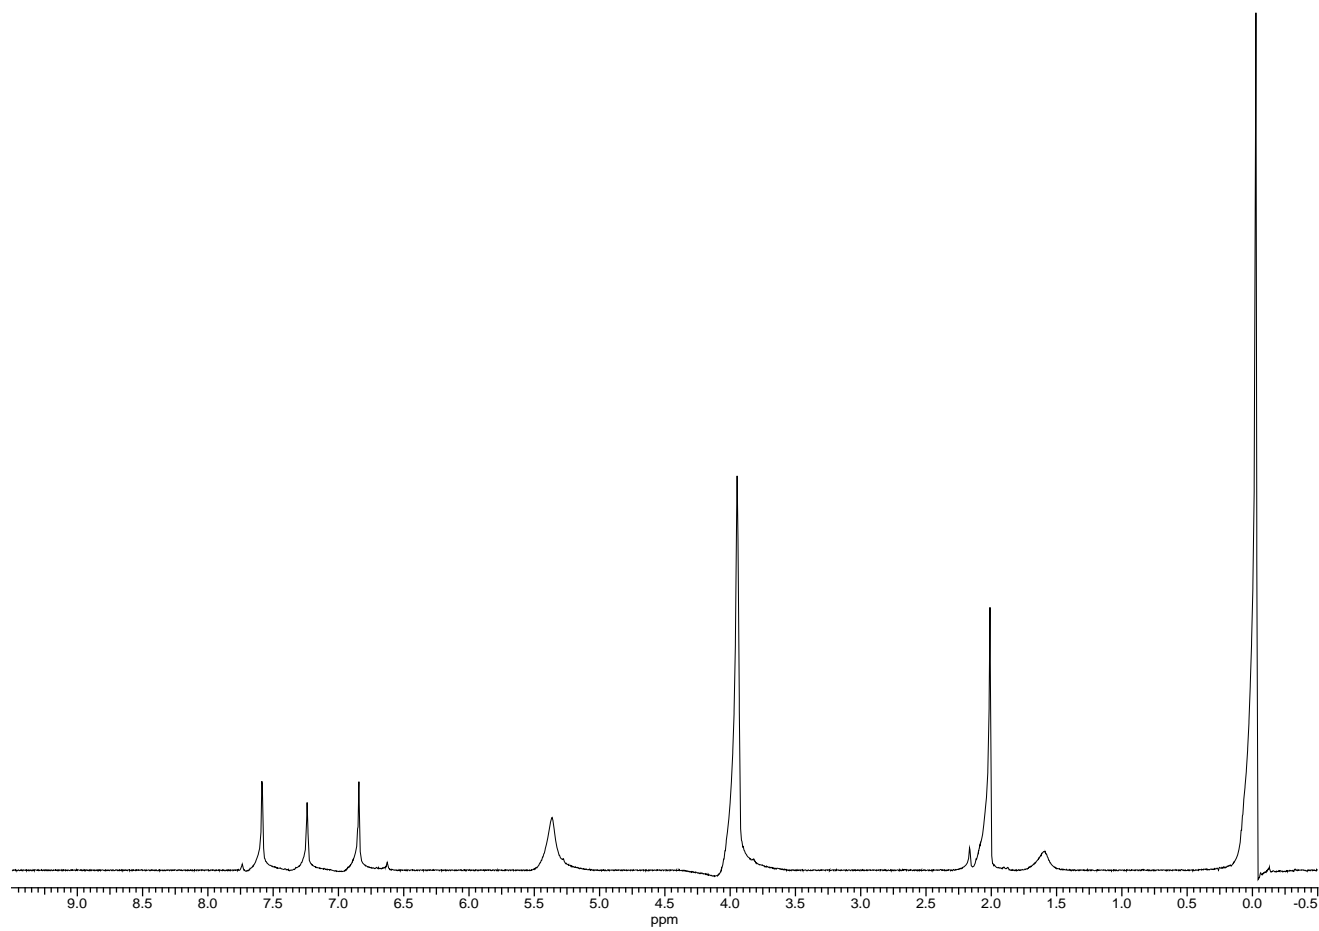

Figure S5. Structure,  $^1\text{H}$  NMR, and  $^{31}\text{P}$  NMR of DMNPE-caged NADP

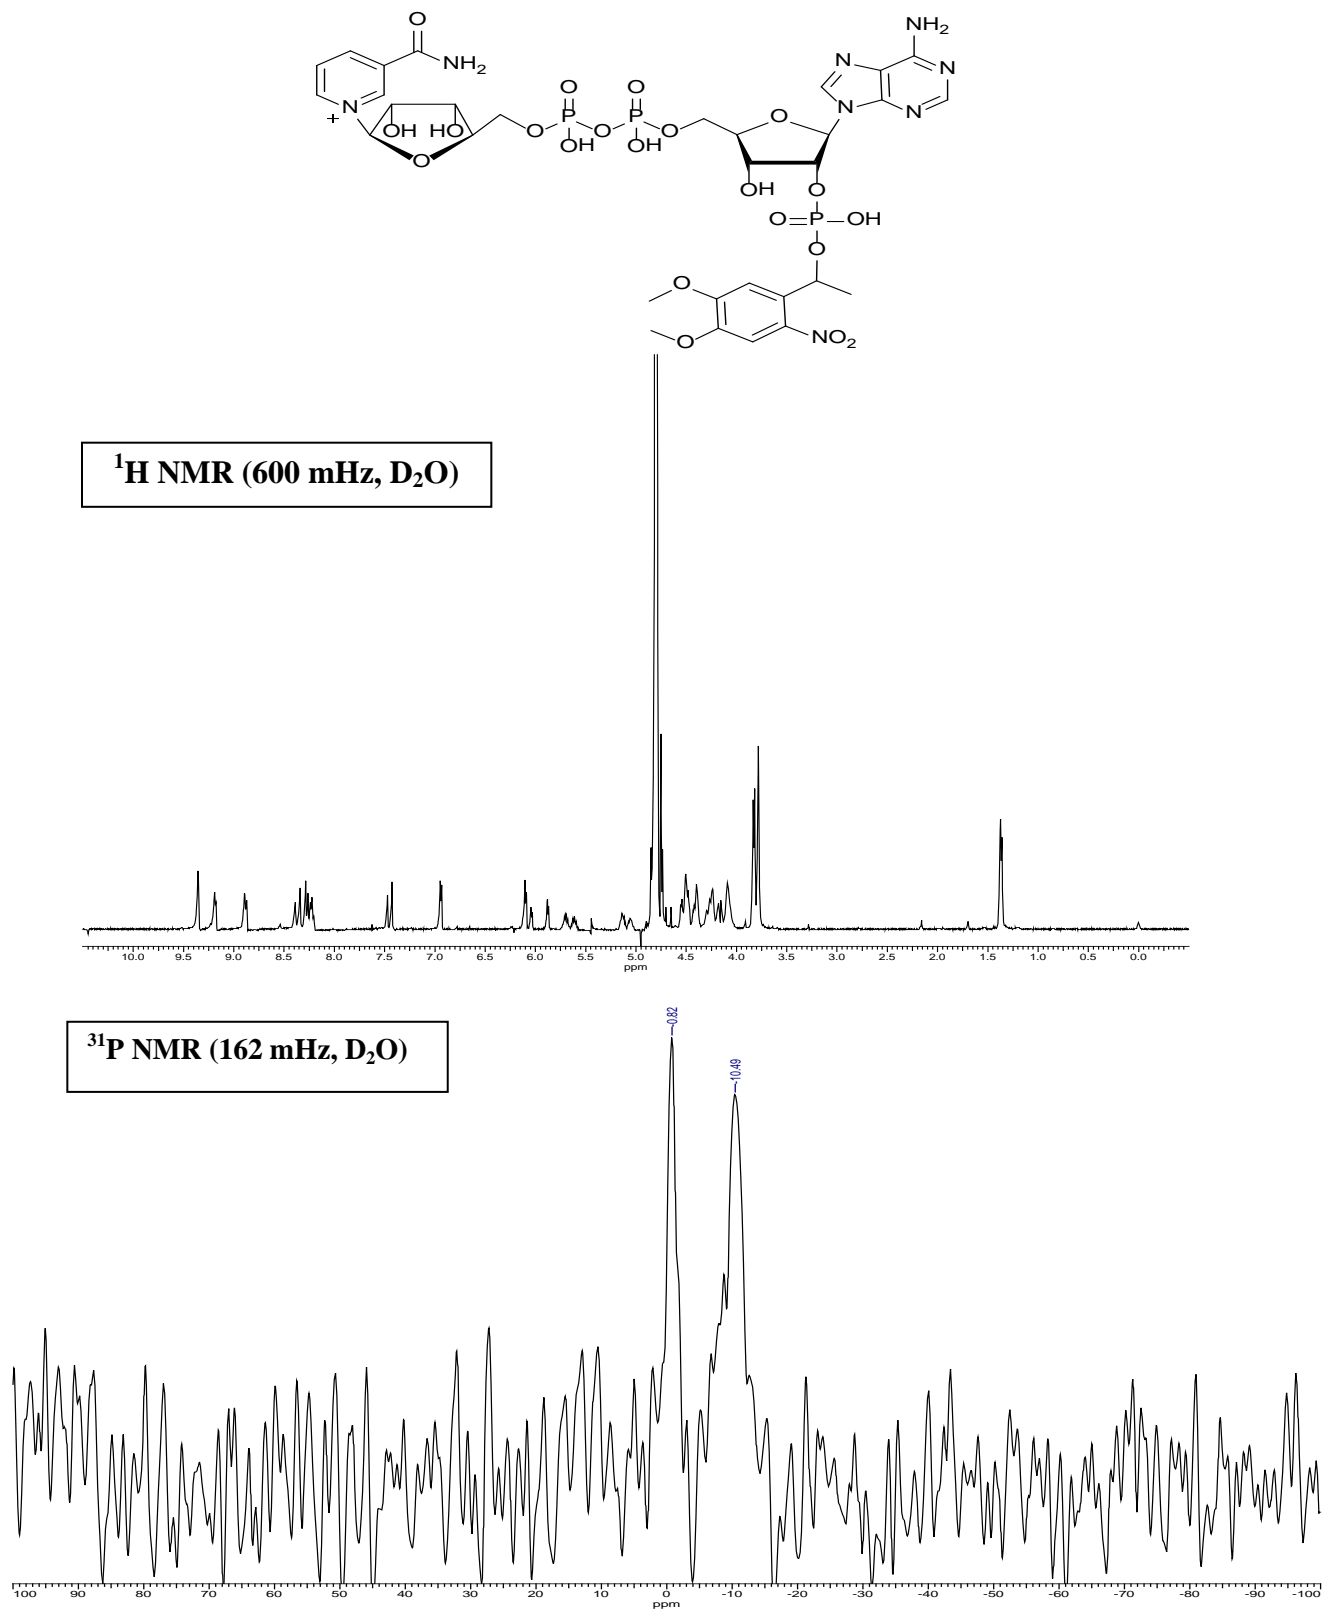





Figure S6 continued

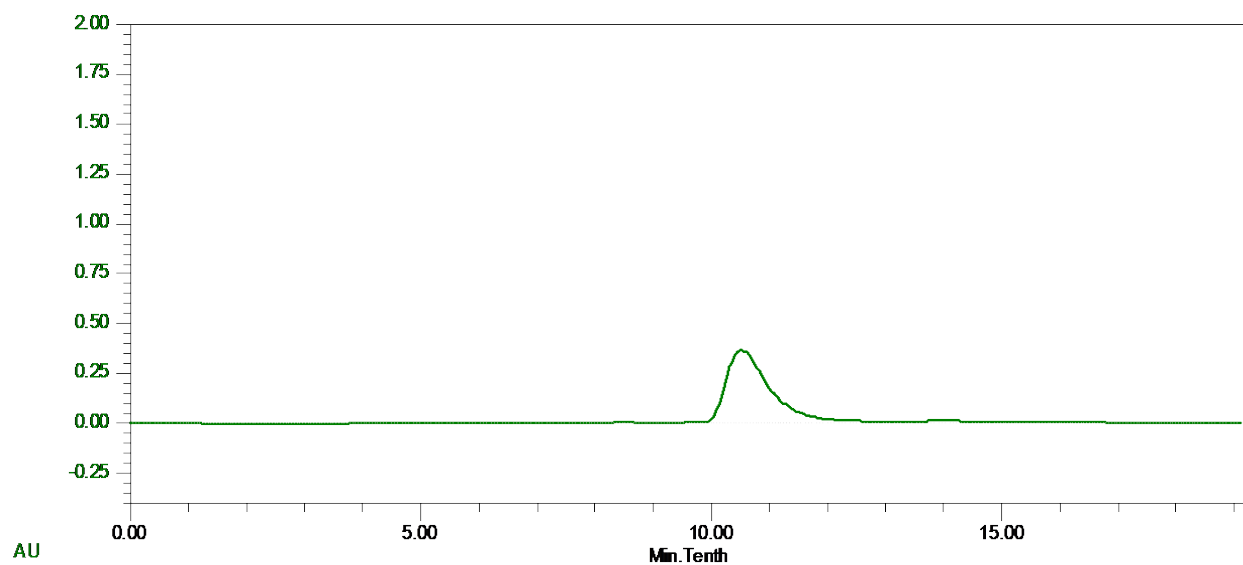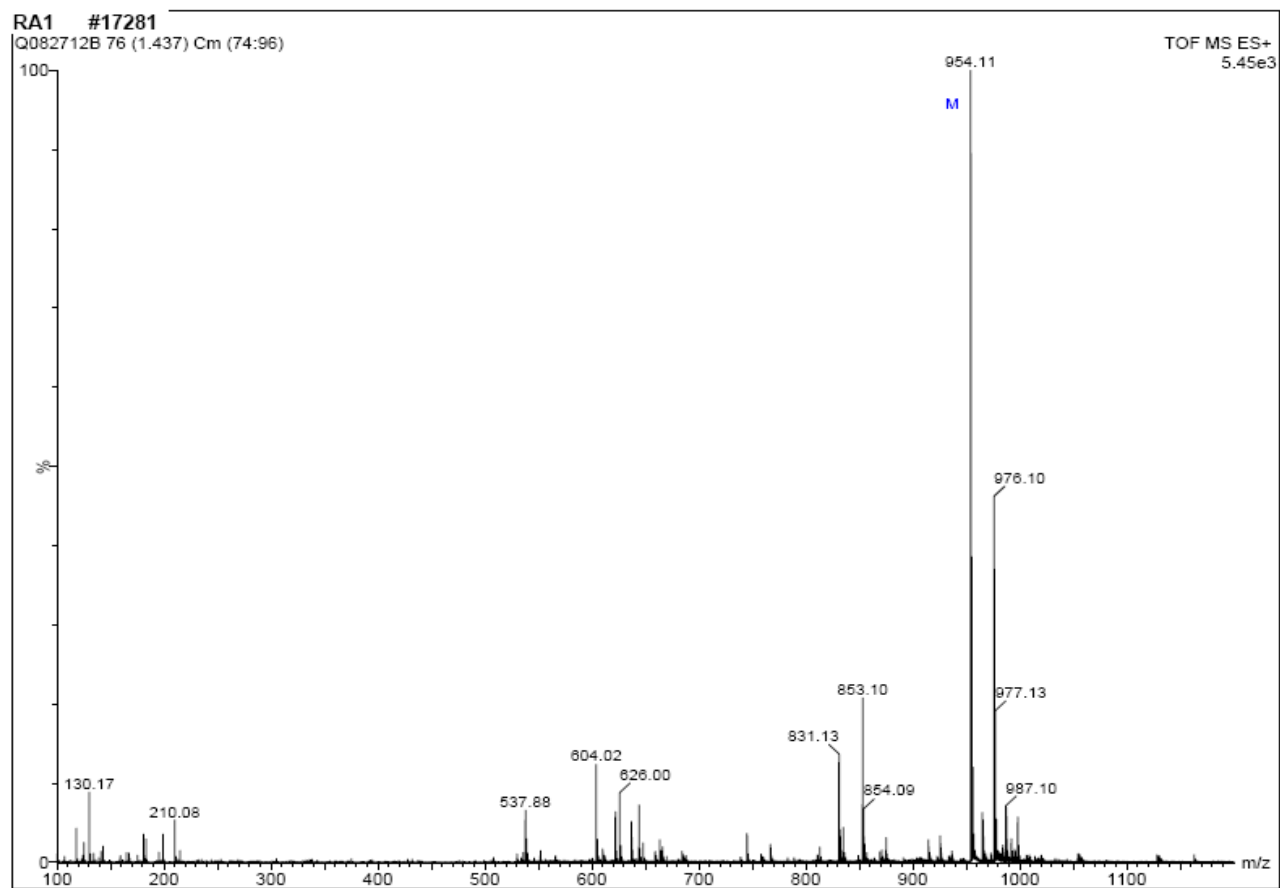

Figure S7. Structure,  $^1\text{H}$  NMR,  $^{31}\text{P}$  NMR, HPLC trace, and HRMS of caged 4-methyl-NAADP

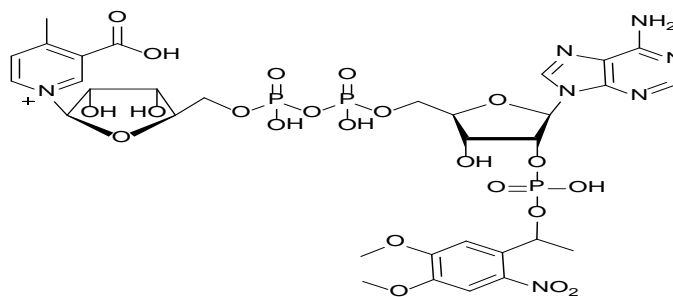

$^1\text{H}$  NMR (600 MHz,  $\text{D}_2\text{O}$ )

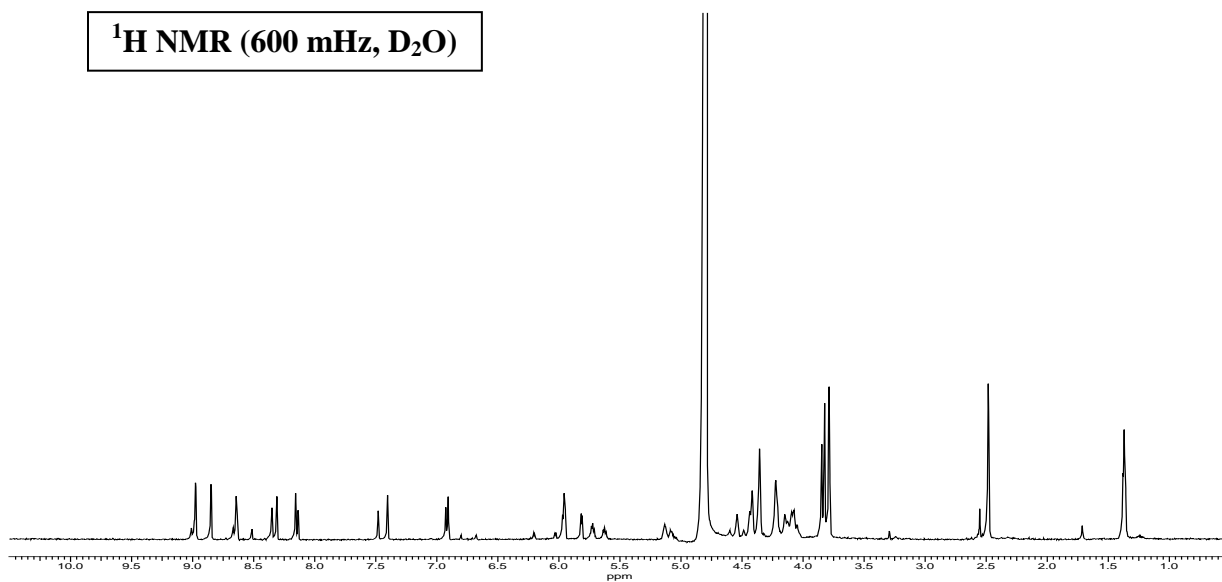

$^{31}\text{P}$  NMR (162 MHz,  $\text{D}_2\text{O}$ )

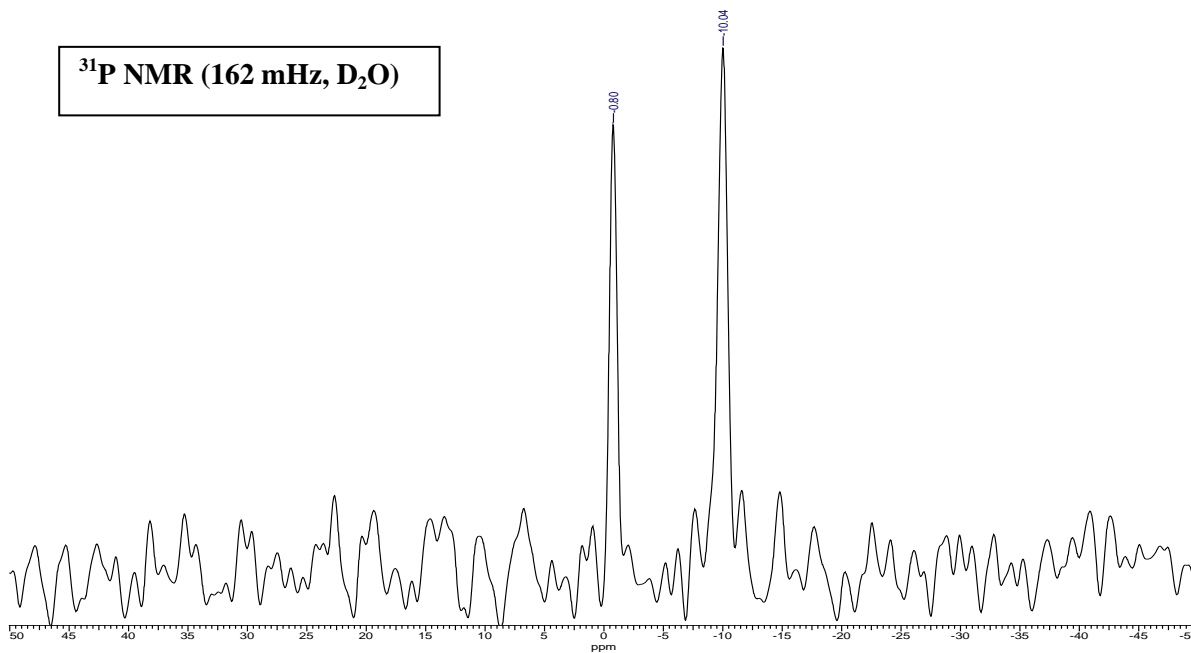

Figure S7 continued

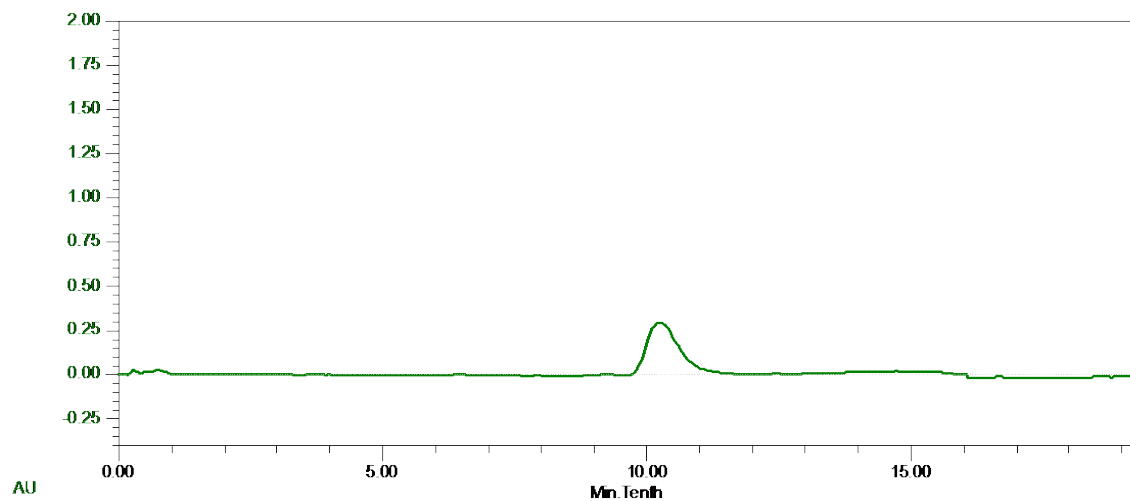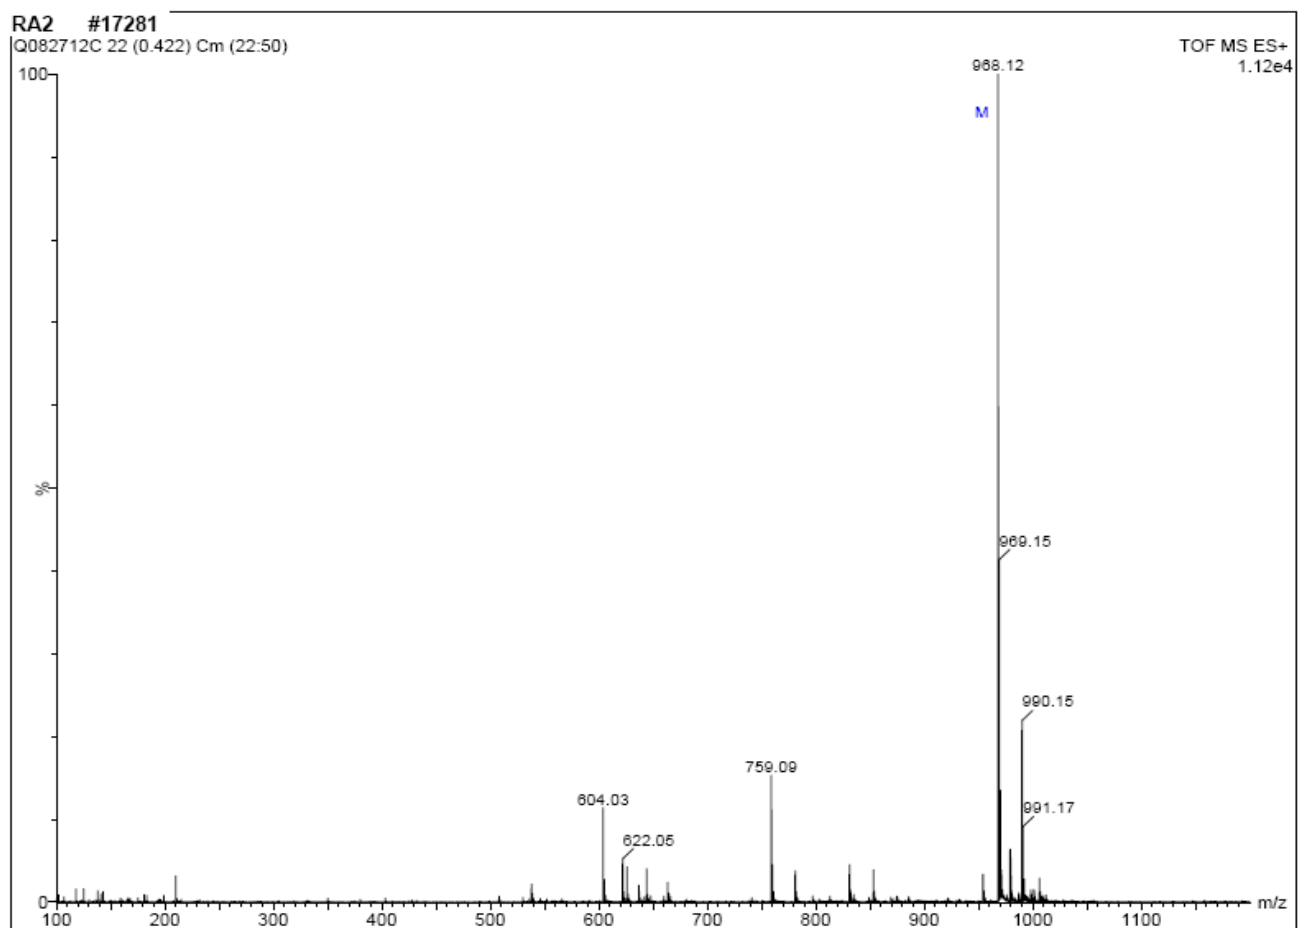

Figure S8. Structure,  $^1\text{H}$  NMR,  $^{31}\text{P}$  NMR, HPLC trace, and HRMS of caged 5-methyl-NAADP

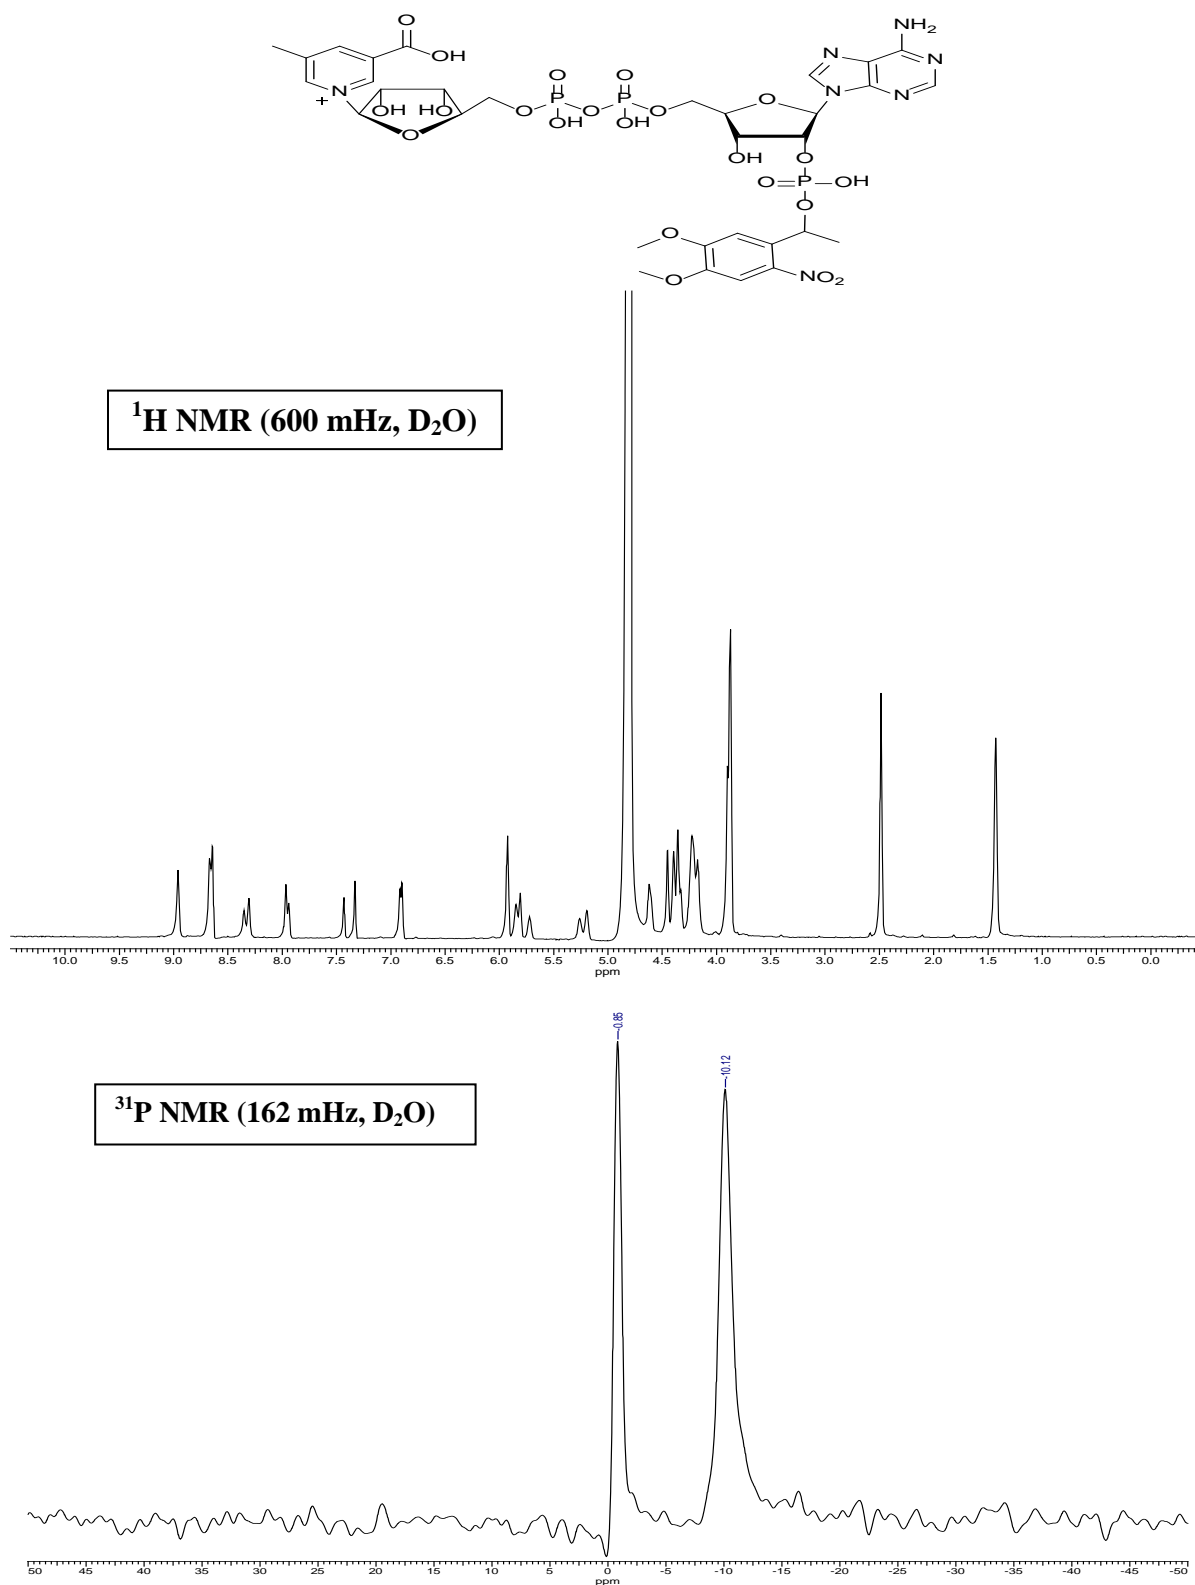

Figure S8 continued

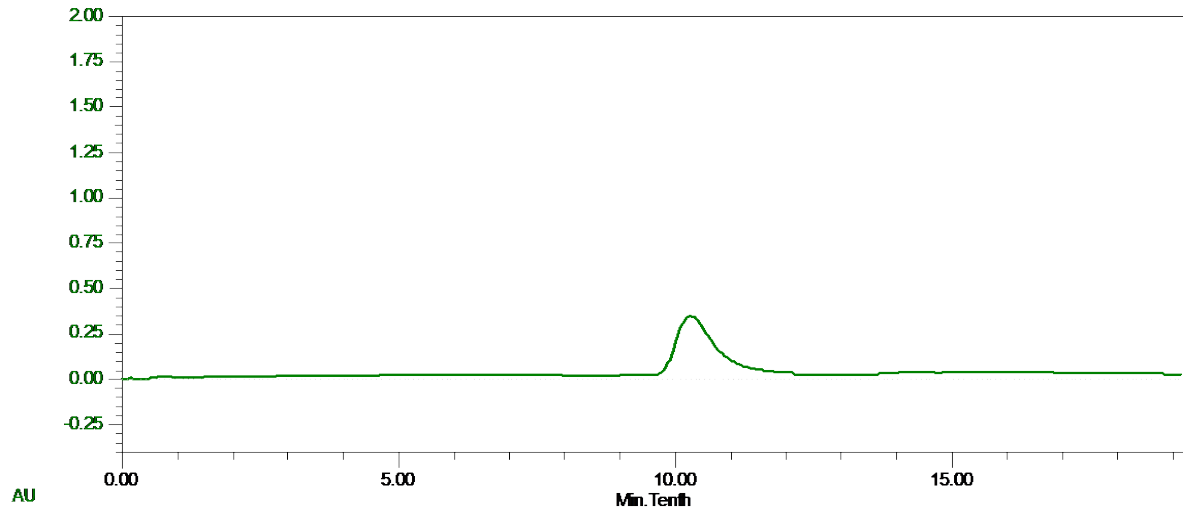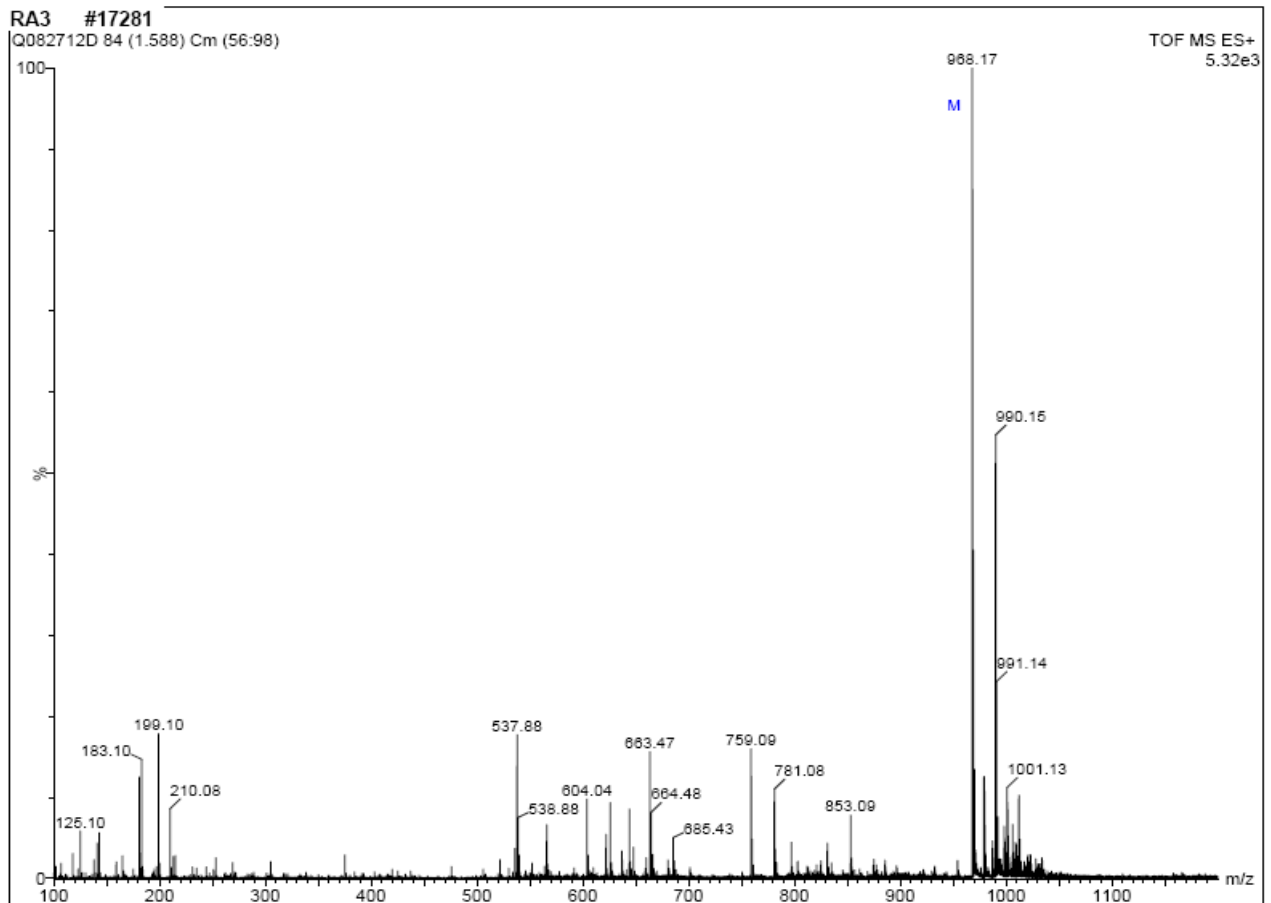



Figure S9 continued

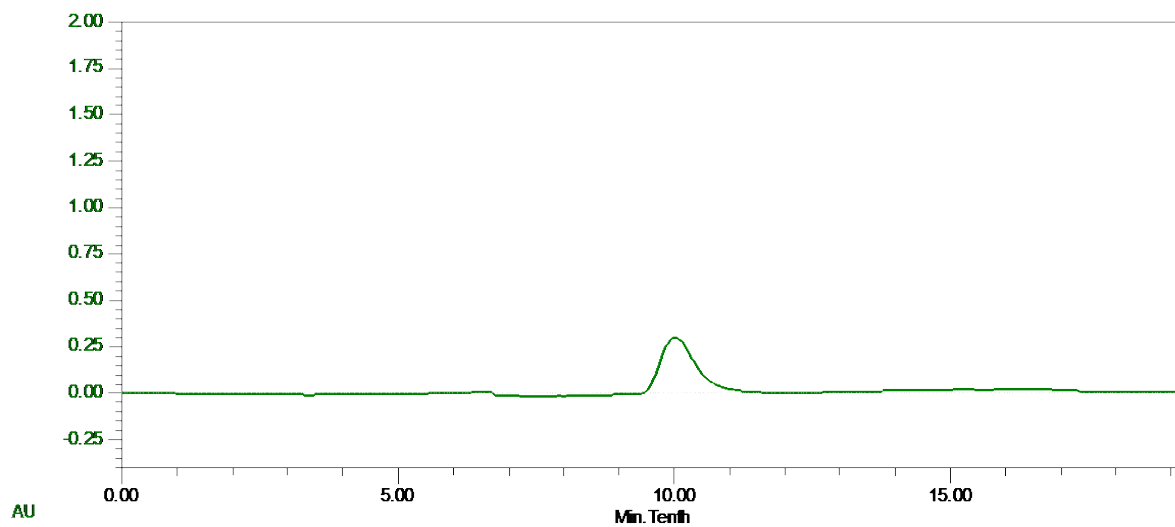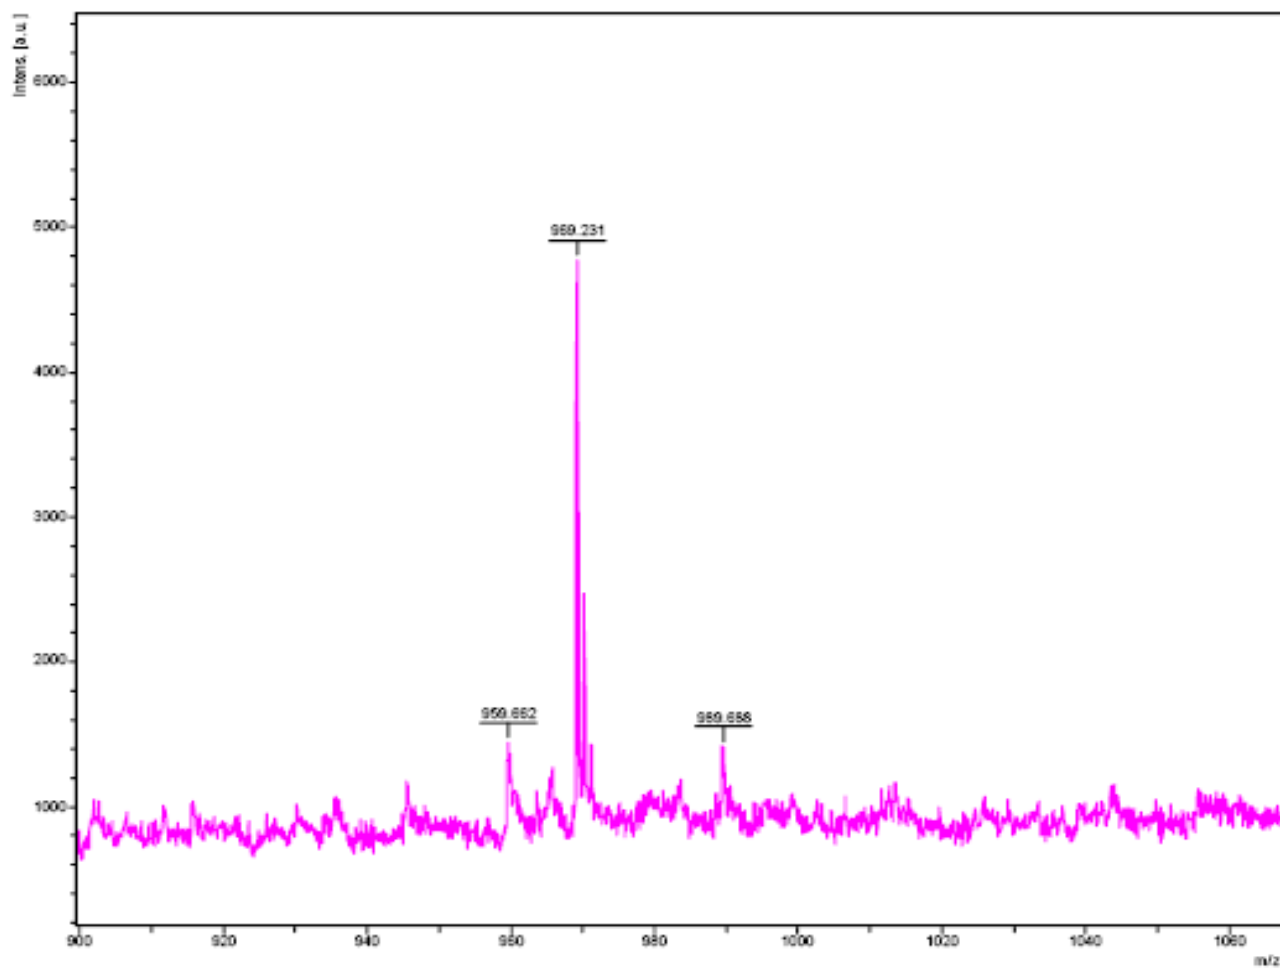

Figure S10. Structure,  $^1\text{H}$  NMR,  $^{31}\text{P}$  NMR, HPLC trace, and HRMS of caged 5-thiomethyl-NAADP

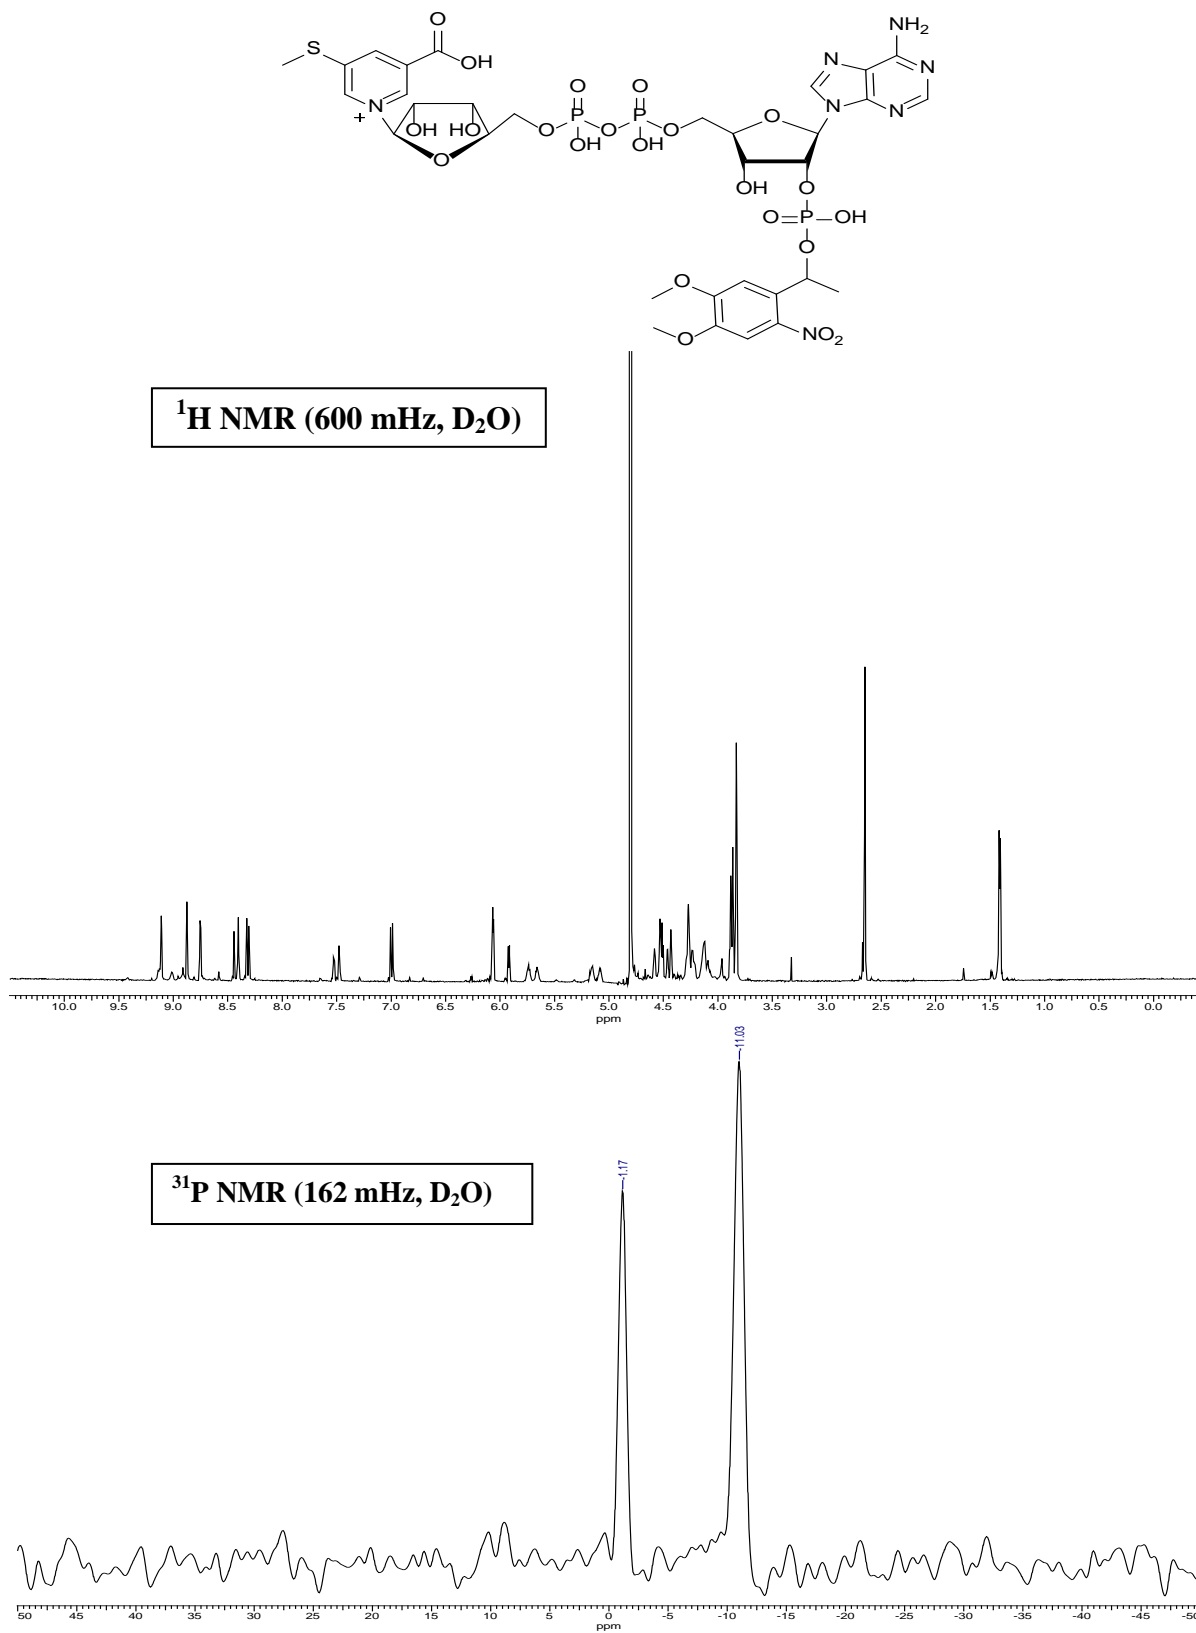



Figure S10 continued

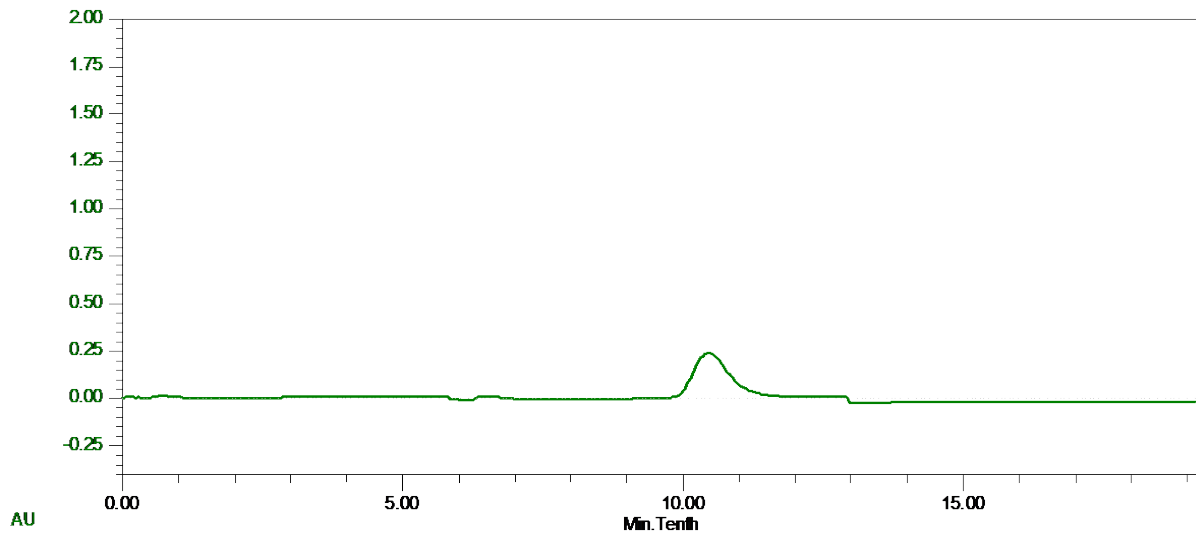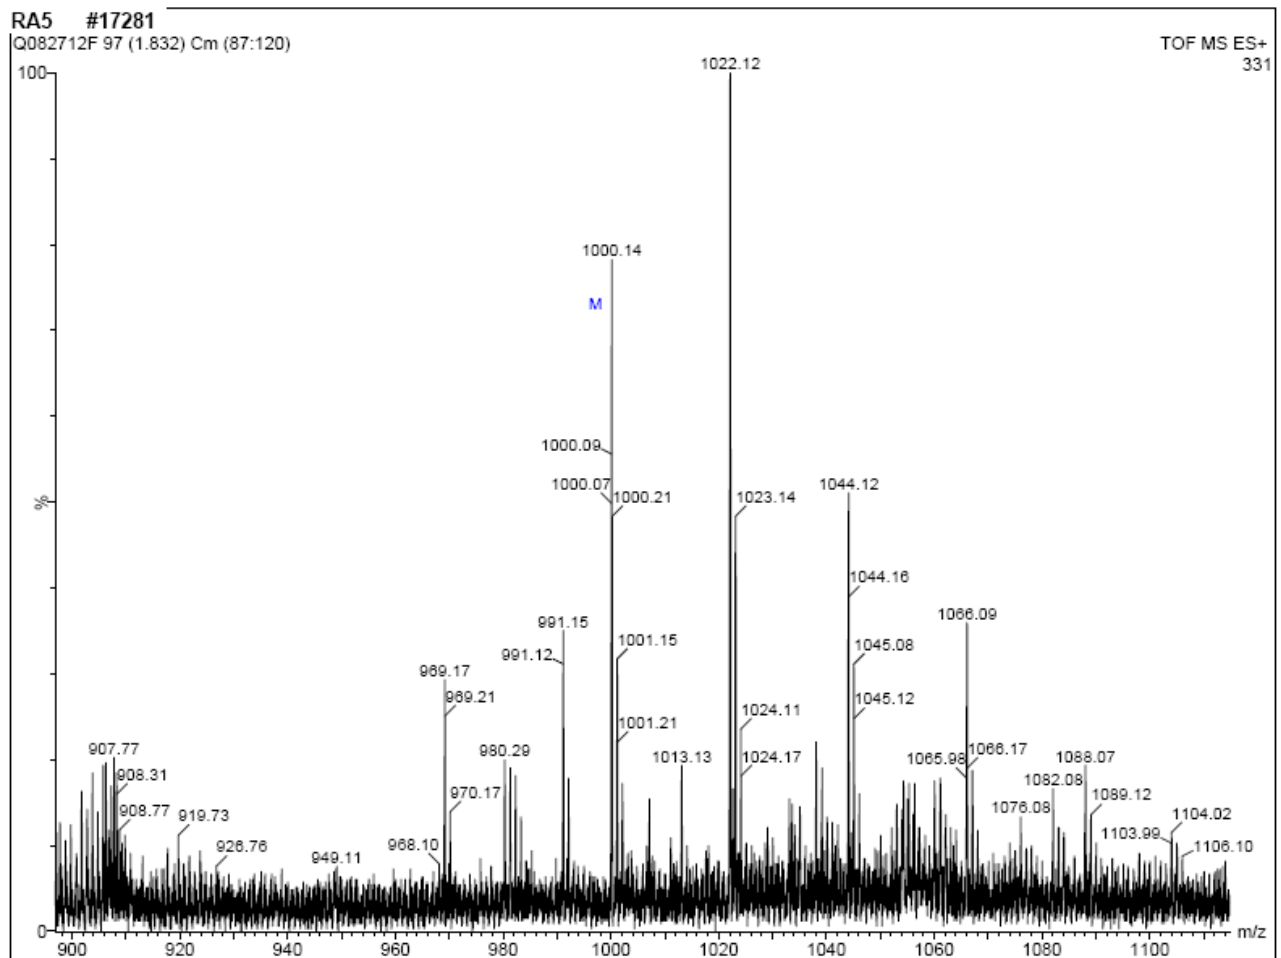

Supplement: NIHMS557844-supplement-01.pdf [file NIHMS557844-supplement-01.pdf]
